# Supplementary material for: Characterization of functional relationships of R-loops with gene transcription and epigenetic modifications in rice
Source: HighWire-hosted journal article supplement (doi:10.1101/gr.246009.118), 2019-07-01
Supplement: Supplemental_materials_.docx [file Supplemental_materials_.docx]

**Supplemental materials**

**Characterization of functional relationships of R-loops with gene transcription and epigenetic modifications in rice**

Yuan Fang1,6, Lifen Chen1,6, Kande Lin1, Yilong Feng1, Pengyue Zhang1, Xiucai Pan1, Jennifer Sanders2, Yufeng Wu1, Xiu-e Wang1, Zhen Su3, Caiyan Chen4, Hairong Wei*2,5, Wenli Zhang*1

6 These authors contributed equally to this work

*Address correspondence to: **Wenli Zhang** ([wzhang25@njau.edu.cn](mailto:wzhang25@njau.edu.cn)) or **Hairong Wei** ([hairong@mtu.edu](mailto:hairong@mtu.edu))

**Supplementary Results**

Adaptation of the DRIP-seq methodology for identifying R-loops in rice

Validation of R-loops in the rice genome

Genomic distribution of R-loops in the rice genome

Characteristics of DNA sequences associated with R-loops

Antisense R-loops are evidently associated with longer genes

**Supplementary Discussion**

**Supplementary Methods**

Growth of rice seedlings and induction of rice calli

Rice transformation

DNA:RNA hybrids immunoprecipitation (DRIP)

Directional DRIP-seq library preparation

Non-denaturing BS-seq (NBS-seq) library preparation

Analysis of NBS-seq and BS-seq

G-quadruplex immunoprecipitation in combination with PCR

and qPCR assays (G4s-ChIP-PCR or -qPCR)

Dot blotting assay with S9.6 antibody, anti-5mC, anti-6mA and the

recombinant BG4 protein

Western blotting assay

Strand specific RT-PCR (ssRT-PCR) assay

DRIP-qPCR assay

Normalization of read counts

Gene ontology (GO) and KEGG enrichment analysis

Motif prediction

**Supplementary Figures**

Supplemental_Fig_S1.pdf

Supplemental_Fig_S2.pdf

Supplemental_Fig_S3.pdf

Supplemental_Fig_S4.pdf

Supplemental_Fig_S5.pdf

Supplemental_Fig_S6.pdf

Supplemental_Fig_S7.pdf

Supplemental_Fig_S8.pdf

Supplemental_Fig_S9.pdf

Supplemental_Fig_S10.pdf

Supplemental_Fig_S11.pdf

Supplemental_Fig_S12.pdf

Supplemental_Fig_S13.pdf

Supplemental_Fig_S14.pdf

Supplemental_Fig_S15.pdf

Supplemental_Fig_S16.pdf

**Supplementary Tables**

Supplemental_Table_S1.pdf

Supplemental_Table_S2.pdf

Supplemental_Table_S3.pdf

Supplemental_Table_S4.xlsx

Supplemental_Table_S5.pdf

Supplemental_Table_S6.pdf

Supplemental_Table_S7.pdf

Supplemental_Table_S8.xlsx

Supplemental_Table_S9.pdf

Supplemental_Table_S10.pdf

Supplemental_Table_S11.pdf

**Supplementary Results**

**Adaptation of the DRIP-seq methodology for identifying R-loops in rice**

To test the specificity of the commercial S9.6 antibody in rice (Kerafast; ENH001) ([Boguslawski et al. 1986](#_ENREF_5)), we conducted a dot blotting assay. A visible dot-like immuno-signal was observed when 50 ng or more DNA without RNase H treatment was used; in contrast, no signal was detectable in each corresponding sample treated with RNase H (**Supplemental Fig. S1A**). Since RNase H specifically digests RNA-DNA paired structures, this led to depletion of R-loop signals ([Crouch and Dirksen 1982](#_ENREF_8); [Garcíarubio et al. 2015](#_ENREF_13)). These results authenticated the specificity of the S9.6 antibody in binding to R-loops in the rice genome.

To identify R-loops across the rice genome, we adapted a methodology called DNA:RNA hybrid (R-loop)-immunoprecipitation followed by high-throughput sequencing (DRIP-seq) **(Supplemental Fig. S1B)**, which combines a DRIP experiment ([Sanz et al. 2016](#_ENREF_29); [Bayona-Feliu et al. 2017](#_ENREF_1); [Xu et al. 2017](#_ENREF_39)) with a directional library preparation ([Nadel et al. 2015](#_ENREF_27)) for sequencing. DRIP-seq can enrich R-loops formed by hybridization of RNA strands with either the Crick or the Watson DNA strands, leaving single-stranded Watson (wR-loops) or Crick (cR-loops) DNA strands conformation **(Supplemental Fig. S1C)**. We constructed a total of four DRIP-seq libraries for sequencing, two replicates for seedlings and two for calli **(Supplemental** **Table S6**). Spearman’s rank correlation was employed to test the correlation of read densities between two biological replicates from the same tissue; correlation coefficients of 0.90 and 0.89 were found for seedlings and calli, respectively (**Supplemental Fig. S11A**). The global landscapes of R-loops between the two biological replicates in each tissue were very similar to each other (**Supplemental Fig. S11B**), which is indicative of the reproducibility of the data and the reliability of the adapted methods that were used for identification of R-loops in rice.

Before calling R-loop peaks, we performed a saturation simulation assay to test the sequencing depth. We randomly divided all sequencing data from either seedlings or calli into 10 equal parts, and then built 10 bins with different sequencing depths by merging the first parts into the bins, where . We then performed R-loop identification using our established procedures for all 10 bins. For data from both tissues, the total peak number and peak length of wR-loops or cR-loops in each tissue increased gradually and exhibited logarithmic growth as the sequence depth increased (**Supplemental Fig. S12A**). In addition, we calculated the peak distribution among different Q values (the multiple adjusted *p*-values) representing the significance levels of peaks. The higher a negative logarithmic Q value is, the more significant a peak level is. The number of peaks increased slowly as the negative logarithmic Q values increased (**Supplemental Fig. S12B**). The saturation simulation assay demonstrated that the number of highly significant peaks was much less affected by sequencing depths. For example, the growth rates of peaks with respect to the sequencing depths tended to become steady after passing an exponential growth phase in both data sets (**Supplemental Fig. S12A**). Taken together, the results of simulation assays indicate that the sequencing depths we had were sufficient for identifying the vast majority of significant R-loops in the rice genome.

Finally, we performed global R-loop identification, and obtained a total of 38,223 and 38,613 wR-loops for seedlings, and 38,012 and 37,408 cR-loops for calli, with a stringent cut-off value (-LogQvalue set to -10).

**Validation of R-loops in the rice genome**

To validate the R-loops identified using the adapted DRIP-seq methodology, we constructed and sequenced non-denaturing bisulfite sequencing libraries (NBS-seq) using the same batches of DNAs as used for the DRIP experiments. As expected, a higher conversion rate of cytosine to thymine, which corresponds to a lower ratio of C/(C+T), occurred in R-loop regions as compared to flanking regions in both seedlings and calli (**Supplemental Fig. S13A, B**). The NBS-seq approach confirmed that the unmethylated cytosines within the single-stranded regions of R-loops were efficiently converted into uracils (C to U) by the bisulfite treatment. Moreover, we randomly selected 104 R-loop loci to test for the presence of RNAs within the R-loop regions by using strand-specific RT-PCR (ssRT-PCR). A clear DNA band was observed in approximately 85% of loci (88/104) (**Supplemental Fig. S13C; Supplemental Table S7**), implying the existence of strand-specific unidirectional transcription (only F or R in two adjacent lanes had a DNA band), or bidirectional transcription (both F and R of two adjacent lanes had DNA bands). In addition, we randomly selected four R-loop regions as positive controls (P-1, P-2, P-4, and P-6), and three regions without R-loops as negative controls (N-2, N-3, and N-4) for the DRIP-qPCR assay (**Supplemental Fig. S13D, E; Supplemental Table S8)**. All positive controls exhibited a significantly higher value (relative to the percent input) than negative controls. When the DNA immunoprecipitated from the RNase H-treated genomic DNA was used for the qPCR assay, a decrease in the qPCR value was observed for each positive control, indicating that RNase H treatment abolished R-loop signals (**Supplemental Fig. S13D, E)**. RNase H treatment also eliminated R-loop signals on a genome-wide scale in both tissues (**Supplemental Fig. S13E)**.

Consistent with a previous report ([Shafiq et al. 2017](#_ENREF_30)), we identified R-loops in five rice genes, that include *OsARF7, OsARF19, OsABCB13, OsABCB14, and OsPIN1a*. The R-loops overlapping these genes were reported to play a role in polar auxin transport and plant root development **(Supplemental Fig. S13F)**. The rediscovery of the genes with R-loops suggests that our DRIP-seq data can reliably reflect the authentic positions and statuses of R-loops in the rice genome. Our findings also verified the previous reports showing that sonication-based DNA fragmentation does not affect DRIP efficiency and accuracy for global R-loop identification ([Zhang et al. 2012](#_ENREF_43); [Bayona-Feliu et al. 2017](#_ENREF_1); [Halasz et al. 2017](#_ENREF_19)). Thus, all DRIP-seq data sets are well grounded for further analyses, particularly in terms of unveiling the functions of R-loops and their relationships to gene expression and epigenetic modifications in plants.

**Genomic distribution of R-loops in the rice genome**

After global identification of R-loops in rice (**Supplemental Fig. S2A**), we calculated the peak spans, and found that the majority of wR-loops and cR-loops were about 200-500 bp wide in both tissues (**Supplemental Fig. S2B**). To further characterize R-loop peak length variations in both tissues, we calculated the average and median peak lengths of all peaks with a –LogQvalue greater than 10. We found that average/median peak lengths corresponding to seedlings and calli were 394/352 bp and 499 /437 bp, respectively. We determined that there were 3,848 R-loops (approximately 10% of w/c R-loops) in seedlings and 14,960 R-loops (approximately 39% of w/c R-loops) in calli displaying overlapping regions between wR-loops and cR-loops (**Supplemental Fig. S2A**). These overlapping R-loops were named double R-loops (dR-loops) according to the terminology used in the literature ([Reddy et al. 2011](#_ENREF_28)). Similar genomic distributions were observed for cR-loops, wR-loops and dR-loops in both tissues (**Supplemental Fig. S2D**).

To determine if dR-loops are related to bidirectional transcription, we analyzed strand-specific RNA-seq data set with a GEO accession number of SRP047482 ([Zhang et al. 2014](#_ENREF_44)). For 2,280 dR-loops with more than a 50 bp overlap between cR-loops and wR-loops, we detected 119 (5.2%) dR-loops that contained sense and antisense RNA transcripts, confirming the presence of bidirectional transcription (convergent or divergent transcription) at these loci. Since RNA:DNA hybrids were pulled down by the S9.6 antibody in the DRIP-seq assay, some RNAs might be undetectable in regular RNA-seq that primarily reflects transcripts beyond a certain abundance in the genome. To assess if some of the dR-loops are formed by lower levels of bidirectional transcription, we constructed RNase R-treated directional RNA-seq libraries; these libraries primarily contain circular RNAs and linear RNAs that are resistant to RNase R treatment. After a combination of directional RNA-seq and RNase R-treated directional RNA-seq data, we detected 465 (20.4%) total dR-loops that coexisted with bidirectional transcription.

We could not exclude the possibility that the dR-loops were formed coincidentally due to the co-presence of *cis*- and *trans*-RNA that hybridized with the complementary ssDNA strand in the same regions. The percentage of dR-loops was much higher in calli than in seedlings, indicating that dR-loops may occur more frequently in one tissue than another. In addition, we found that approximately 74% of wR-loops or cR-loops overlapped in each tissue examined. The remaining R-loops were tissue-specific, including 9,557 wR-loops and 9,775 cR-loops for seedlings, and 9,947 wR-loops and 9,171 cR-loops for calli (**Supplemental Fig. S2A, D**).

To investigate the genomic distribution of R-loops, we classified the rice genome into seven sub-genomic units based on DNA functionalities as shown(**Supplemental Fig. S2C, D**). These sub-genomic units included exons, introns, 5’UTRs, 3’UTRs, the upstream 1 kb regions of TSSs, the downstream 200 bp regions of TESs, and intergenic regions. As to the genic regions, R-loops, regardless of their type, tended to be associated with promoters and 5’UTRs in both tissues. The percentage of R-loops that overlapped introns is much smaller than the percentage of introns in the genome (**Supplemental Fig. S2C, D**). There were 25.35% wR-loops, 25.39% cR-loops and 31.51% dR-loops detected in exons in calli, which were noticeably higher than the corresponding percentages of 18.55% wR-loops, 18.65% cR-loops and 16.33% dR-loops in seedlings. There were about 10% more dR-loops (25.35%) associated with promoter regions in seedlings than in calli (15.11%) (**Supplemental Fig. S2D**). Such differences indicate that R-loops might be involved in regulating not only gene expression, but also differentiation and development-related biological processes. Finally, the Integrative Genomics Viewer (IGV) snapshots spanning a 126 kb region of chromosome 3 were chosen to display the distribution of different types of R-loop peaks from two tissues (**Supplemental Fig. S2E**). It is obvious that R-loops were largely conserved in positioning while manifesting some distinctive features in both peak sizes and shapes.

**Characteristics of DNA sequences associated with R-loops**

R-loops are preferentially formed at GC-rich genomic regions in yeast ([Chan et al. 2014](#_ENREF_6)), humans ([Ginno et al. 2013](#_ENREF_14)), and *A. thaliana* genomes ([Xu et al. 2017](#_ENREF_39)). Similarly, we found that the average GC content of R-loops in either seedlings or calli was much higher than that of 10,000 randomly selected genomic regions from the same tissue. The highest GC content, 57.54% in seedlings and 63.10% in calli, emerged around the summits of R-loop peaks (**Supplemental Fig. S14A**). GC-rich and AT-rich motifs were present in R-loops that overlapping previously published DNase I hypersensitive sites (DHSs) ([Zhang et al. 2012](#_ENREF_43" \o "Zhang, 2012 #37)) and conserved non-coding sequences (CNSs) ([Freeling and Subramaniam 2009](#_ENREF_12)) in promoters and in introns, respectively. Our further study revealed that R-loops with DHSs or CNSs were found more often in promoters than in introns (**Supplemental Table S9)**. At the sequence level, R-loops with DHSs or CNSs in promoters had fewer AT skews but more GC skews than those in introns (**Supplemental Table S9)**. The single-stranded G-rich sequences have been reported to facilitate the formation of stable secondary structures called G-quadruplexes (G4s) ([Hänsel-Hertsch et al. 2017](#_ENREF_16)), supporting the idea that G4s may preferentially reside in R-loops. Actually, R-loops and G4s have been shown to occur in many different contexts to control various biological processes, including immunoglobulin class switch recombination ([Huang et al. 2006](#_ENREF_21); [Huang et al. 2007](#_ENREF_20)), and the switch between mitochondrial genome transcription and replication ([Wanrooij et al. 2012](#_ENREF_38)).

To investigate if G4s preferentially reside within R-loops in rice, we used typical G4 sequences (G3–5N1–7G3–5N1–7G3–5N1–7G3–5) ([Huppert and Balasubramanian 2005](#_ENREF_22); [Todd et al. 2005](#_ENREF_34); [Hänsel-Hertsch et al. 2016](#_ENREF_15)) to screen the DNA sequences in the displaced single-stranded DNAs of R-loops. We found that 12,880 (16.90 %) R-loops in seedlings and 14,409 (18.95%) R-loops in calli harbored the G4s, which were found to be primarily localized at the center of R-loops **(Supplemental Fig. S15A)**. Similar findings have been reported in humans ([Zheng et al. 2013](#_ENREF_45); [Haeusler et al. 2014](#_ENREF_18); [Kuznetsov et al. 2018](#_ENREF_25)). Our dot-blotting assay proved that BG4 protein, which has been well characterized in humans ([Biffi et al. 2013](#_ENREF_4); [Hänsel-Hertsch et al. 2018](#_ENREF_17)), was capable of binding to the G4s in rice **(Supplemental Fig. S15B**). To further corroborate our computational predictions, we performed PCR or qPCR assay to identify G4s after ChIP using the anti-FLAG antibody, which is capable of detecting the recombinant BG4 protein fused with the FLAG-tag. We randomly selected 5 loci: four positive loci (P1-P4) with G4s and one negative locus (N) without G4s for the PCR assay **(Supplemental** **Table S10**). Our G4-ChIP-PCR results aligned well with the predicted results of G4s **(Supplemental** **Fig. S15C, D**); that is, the relative enrichment (% of input) of G4s from any of the four positive loci (P1-P4) was significantly higher than that of the negative locus N **(Supplemental** **Fig. S15C, D**). The G4-ChIP-qPCR results further confirmed the coexistence of R-loops with G4s in the rice genome **(Supplemental** **Fig. S15E**). Further analysis revealed that R-loops with G4s had higher GC and AT skews than those without G4s (**Supplemental Fig. S14B**).

R-loop read densities were noticeably higher in R-loops with G4s than in those without G4s (**Supplemental Fig. S14C**). In addition, the average lengths of R-loops with G4s were 507 bp in seedlings and 614 bp in calli, which are longer than the 373 bp and 473 bp average lengths for R-loops without G4s in seedlings or calli, respectively (Student’s t-test: *p*-value < 2.2e-16 for both tissues) (**Supplemental Fig. S14C**). Thus, the presence of G4 might facilitate the formation of longer R-loops. As reported in *E.coli* ([Duquette et al. 2004](#_ENREF_9)), G4s favor the formation of G-loops (one specific form of R-loops).

To investigate if R-loops harbor some functional motifs, we screened the displaced G-rich DNA strands for identifying both novel and known DNA motifs. A novel GA-rich motif, MEME-1 (**Supplemental Fig. S14D**), was identified in both tissues using a motif tool called MEME-ChIP. The E-values and enrichment of p-values of this motif in two tissues were shown in **Supplemental Fig. S14D, E**. In addition, four known motifs with various biological functions, MA1404.1, MA1416.1, MA0932.1, and MA1267.1, were identified from the JASPAR database using CentriMO. The GA-rich motifs, MA1404.1 ([Kooiker et al. 2005](#_ENREF_24)) and MA1416.1 ([Vollbrecht et al. 2005](#_ENREF_36)), were predominantly present in seedlings while the two AT-rich motifs, MA0932.1 ([Yun et al. 2012](#_ENREF_42)) and MA1267.1 ([Yanagisawa 2000](#_ENREF_40)), were primarily present in calli (**Supplemental Fig. S14D**).

Interestingly, distinct profiles were observed in seedlings and calli for the probability of occurrence of these motifs (**Supplemental Fig. S14E**). In seedlings, we found that three GA-rich motifs had a high probability of occurrence approximately 50 bp upstream of the center of R-loop. In calli, however, MEME-1 was the only motif whose probability peaked approximately 100 bp upstream of the centers of R-loops, and the other two motifs appeared at the distal regions of R-loops. In addition, when the motifs from all R-loops were compared with various sub sets of R-loops overlapping promoters and introns, both the highly conserved motifs and the ones with variants were observed. The three most significant motifs are listed in **Supplemental Table S11.** For example, the most dominant GA-rich MEME-1 motifs, which were identified from various sub sets of R-loops in promoters and intron regions, were highly conserved while DREME-1 motifs from the same sets of input R-loop sequences were variable and divergent. The presence of both conserved and divergent motifs suggests a two-fold role for R-loops: conserved motifs may underlie common regulatory functions while divergent motifs allow for specialized regulation of cellular processes. Divergent motifs could permit specialized regulation by modulating both the affinity and docking of regulatory proteins ([Fazzio 2016](#_ENREF_10)){Fazzio, 2016 #93} and chromatin architecture ([Chen et al. 2015](#_ENREF_7)). For example, the NDX protein in *A. thaliana* binds to the single-stranded DNA in an R-loop to regulate a set of antisense transcripts originating from the 3' end of the *A. thaliana* FLOWERING LOCUS C (FLC) gene ([Sun et al. 2013](#_ENREF_33)) to regulate flowering time.

**Antisense R-loops are evidently associated with longer genes**

Previous studies have demonstrated that the presence of R-loops either facilitates Pol II pausing ([Isaichev 1973](#_ENREF_23); [Tous and Aguilera 2007](#_ENREF_35); [Belotserkovskii et al. 2010](#_ENREF_2); [Shivji et al. 2018](#_ENREF_31)) or promotes the termination of transcription ([Skourti-Stathaki et al. 2011](#_ENREF_32))in yeast and human genomes. Either way the effect of R-loops is to impede transcription elongation in eukaryotic genomes. Before determining the relationship between different types of R-loops and gene lengths, we sorted genes based on the number of R-loops present. Among genes with R-loops, 70.55% (18,935) and 56.88% (15,703) of genes had a single R-loop, and 22.84% (6,131) and 34.25% (9,455) of genes had two R-loops in seedlings and calli, respectively. For genes with two R-loops, only 18.40% (1,128) of genes in seedlings and 24.54% (2,320) of genes in calli had one S-R-loop and one AS-R-loop; the rest contained either two S- or two AS-R-loops. We then classified genes based on overlapping R-loop types. We specifically focused on genes with only one R-loop (SO-or ASO-R-loop) that was located in promoters, gene bodies, or terminal regions. When the R-loops were in the promoters (**Supplemental Fig. S9A**), there were approximately twice as many genes overlapping with ASO-R-loops compared to genes overlapping with SO-R-loops; that is, 65.3% (5,997) of genes in seedlings and 60.8% (4,385) of genes in calli overlapped ASO-R-loops, whereas only 31.1% (1,694) of genes in seedlings and 31.3% of genes in calli (1,497) overlapped SO-R-loops. For the R-loops in the 3’ terminal regions, 23.7% (1,290) of genes in seedlings and 17.2% (823) of genes in calli overlapped SO-R-loops, while only 3.7% (342) of genes in seedlings and 3.7% (268) of genes in calli overlapped ASO-R-loops.

Upon calculating the lengths of genes, we found that the average lengths of genes with ASO-R-loops in promoters, gene bodies, or terminal regions were much longer than those with SO-R-loops in any of these regions **(Supplemental Fig. S9B)**; this was true in both tissues. To further investigate the relationship between different types of R-loops and gene lengths, we classified genes into four sub-groups, namely no R-loops, SO-R-loops, ASO-R-loops, and S/AS-R-loops, and then calculated the average length of genes for each type of R-loops. We found that all genes with R-loops were generally longer than genes without R-loops. As shown in **Supplemental Fig. S9C**, the average lengths of genes with SO-R-Loops, ASO-R-loops, and S/AS-R-loops were 2,493 bp, 3,496 bp, and 4,562 bp, respectively, in seedlings, and 2,518 bp, 3,351 bp and 3,857 bp, respectively, in calli. In contrast, the average lengths of genes without R-loops were 2,097 bp in seedlings and 2,180 bp in calli.

To assess if the effects of R-loops on gene lengths depend on gene expression levels, we also classified genes into five expression ranges, FPKM 20-, 10-20, 1-10, 0-1 and 0, based on their expression levels. We then examined the relationship between different types of R-loops and gene lengths in each category. We found that the lengths of genes with S/AS-R-loops were significantly longer than genes with other types of R-loops or without R-loops (**Supplemental Fig. S9C)**. The average lengths of genes with ASO-R-loops were longer than those with SO-R-loops in all the expression ranges except the highest (20-) in seedlings, and in all the expression ranges except 10-20 in calli **(Supplemental Fig. S9D**). The overall positive correlation between gene lengths and expression levels (**Supplemental Fig. S9D**) seems to contradict the widely held belief that shorter genes are usually expressed at higher levels than longer ones.

To further scrutinize the relationships among gene lengths, expression levels and the types of R-loops, we divided all 27,561 expressed non-TE genes (FPKM>0) into 200 bins from low to high expression levels in seedlings, and analyzed the relationship between average gene lengths and average gene expression levels. We observed a negative correlation in the first and last 50 bins, but we observed a positive correlation in the 50th~150th bins (**Supplemental Fig. S9E**). When this analysis was carried out independently for each type of R-loop, largely similar trends were observed **(Supplemental Fig. S9F**). The results indicated that both positive and negative correlations exist between gene lengths and expression levels, which are largely contingent on gene expression ranges.

**Supplementary Discussion**

We adapted a DNA:RNA hybrid immunoprecipitation (DRIP)method for characterization of R-loops in rice. The DRIP-seq method can yield the results that are not interfered by other non-B DNA conformations, such as triple–stranded H-DNA or triplex DNA structures ([Frank-Kamenetskii and Mirkin 1995](#_ENREF_11); [Belotserkovskii et al. 2013](#_ENREF_3)). Although the method uses S9.6 antibody to precipitate R-loops, only DNA:RNA hybrids can be used as a template for strand-specific DRIP-seq library preparation, and ssDNA can not be amplified in the library (**Supplemental Figs. S16A, B**).

Our comprehensive analyses of DRIP-seq data revealed some potential functions of different types of R-loops and their connections with gene expression and epigenetic modifications. These include, but are not limited to, the correlations between the R-loops peak levels and gene expression levels in different genic regions. After comparatively studying the genes with similar expression levels overlapping SO-R-loops and dR-loops, or ASO-R-loops and dR-loops, we failed to observe much difference in read intensities between SO-R-loops and sense R-loops in dR-loops, or between ASO-R-loops and AS-R-loops in dR-loops (**Supplemental Fig. S16C**). These results do not support the idea that sense and antisense R-loops of dR-loops are formed by unidirectional transcription in different cell populations in the tissues sampled. It is more likely that dR-loops are formed in the same cell population, but additional studies are needed to identify the sources and types of RNA present in dR-loops

**Supplementary Methods**

**Growth of rice seedlings and induction of rice calli**

Uniformly germinated rice cultivar “Nipponbare” seeds were grown in a greenhouse at a temperature of 30-34 ℃ with a 12 h/12 h light-dark cycle for two weeks. Two-week-old rice seedlings were collected and ground into fine powder in liquid nitrogen, and used for isolation of nucleus and genomic DNA.

For callus induction, the “Nipponbare” seeds were sterilized and cultured in rice callus induction medium (NB basal medium plus vitamins, glutamine, proline, casein hydrolysate, sucrose, and phytogel as well as 3 mg/L 2,4-D at pH 5.8) in growth chamber at 28 °C–29 °C in the dark. Three-week-old calli were collected and ground into fine powder in liquid nitrogen, and used for isolation of nuclei and genomic DNA.

**Rice transformation**

Plasmid vectors for knocking out two putative rice 6mA modifier genes, *LOC_Os02g45110* and *LOC_Os10g31030*, were constructed using CRISPR-cas9 systems. Both of these two genes encode a homologous MTA-70 domain protein that is necessary for 6mA modification in *A. thaliana* ([Luo et al. 2014](#_ENREF_32)). The constructs were transformed into AGL1 *Agrobacterium tumefaciens*, which was then used to infect calli induced from mature rice cultivar “Nipponbare” seeds. Transfected calli were screened on the selection medium containing hygromycin that can eliminate non-stably transformed cells. Regenerated plants with hygromycin resistance were transferred to the field for selfing.

**DNA:RNA hybrids immunoprecipitation (DRIP)**

Rice seedlings and calli were used for isolation of nuclei according to our previously published protocols ([Zhang et al. 2012](#_ENREF_43)). Purified nuclei were used to extract high quality genomic DNA using three rounds of phenol, phenol:chloroform, and chloroform extraction coupled with cold ethanol precipitation. Purified genomic DNA was sonicated into fragments of 200-500 bp. 5 μg sonicated DNA with or without RNase H treatment was purified and incubated overnight at 4 ℃ with 10 μg of well characterized S9.6 antibody in IP buffer (10 mM NaPO4, 140 mM NaCl, 0.05% Triton X-100) followed by the addition of 30 μl of protein G magnetic beads. After washing with IP buffer three times, the beads were eluted with 250 μl elution buffer (50 mM Tris-HCl pH 8.0, 10 mM EDTA, 0.5% SDS) twice at 65 ℃ for 15 min. S9.6 antibody-bound DNA was then purified using phenol-chloroform extraction and pelleted with ethanol. Air-dried DNA was re-suspended in 20 μl of 10 mM Tris-HCl (pH 8.0) for library preparation and PCR assay.

**Directional DRIP-seq library preparation**

Although DNA immunoprecipitated using the S9.6 antibody contained DNA:RNA hybrids as well as displaced ssDNA, only DNA:RNA hybrids were used as templates for the synthesis of the second DNA strands. Briefly, the library preparation started directly from the second strand synthesis step by skipping the preparation of mRNA fragments and the first cDNA synthesis steps. The dUTP incorporated second-strand DNA was synthesized using DNA polymerase I. The remaining steps exactly followed the protocols for Illumine RNA-seq library preparation for sequencing. DRIP-seq libraries were subjected to quality control before they were loaded to the Illumina HiSeq 2500 platform for sequenced.

**Non-denaturing BS-seq (NBS-seq) library preparation**

The non-denaturing sonicated genomic DNA used in the DRIP experiment, was also used for the bisulfite treatment with the EZ DNA Methylation-Gold kit (ZYMO Research, D5005). The bisulfite reaction and purification of bisulfite-treated DNA was carried out according to the procedures provided with the kit. The purified DNA was used for BS-seq library preparation using the NEBNext® Ultra™ II DNA Library Prep Kit for Illumina sequencing (NEB, E7645S). NBS-seq libraries were sequenced using the paired-end mode on the Illumina HiSeq 4000 platform.

**Analysis of NBS-seq and BS-seq**

Low quality reads and adapters were removed from the raw data by using Trim Galore!. Clean data was mapped to the rice reference genome (MSU7.0) using Bismark ([Krueger and Andrews 2011](#_ENREF_6)). Uniquely mappable reads were used to calculate the methylated cytosines using the bismark methylation_extractor program. We estimated the DNA methylation level at each cytosine only when the total number of all C+T counted for that position was no less than 5. The methylation ratio for each single cytosine nucleotide was calculated as the number of unconverted cytosines divided by the total number of the uniquely mappable reads at each targeted locus. To calculate the DNA methylation levels in different regions, we split each region into small windows (20 bp each), and the DNA methylation levels were calculated by averaging the DNA methylation ratios of all cytosine sites in each window.

**G-quadruplex immunoprecipitation in combination with PCR and qPCR assays (G4s-ChIP-PCR or -qPCR)**

5ml of finely ground powder, which was from the same batch of plant materials used for the DRIP-seq assay, was fixed in a solution of 1% formaldehyde in nuclei isolation solution (10 mM Tris-HCl, 80 mM KCl, 10 mM EDTA, 1 mM spermidine, 1 mM spermine, 0.15% mercaptoethanol, 0.5 M sucrose, pH 9.5) on ice under vacuum for 10 min. The fixation was immediately quenched by adding 2.5 M glycine to a final concentration of 125 mM, and filtered through four-layers of Miracloth (Calbiochem); the nuclei were then pelleted from the filtrate at 4,000 x g for 10 min at 4 ℃, and washed three times with freshly prepared wash buffer (10 mM Tris-HCl, 80 mM KCl, 10 mM EDTA, 1 mM spermidine, 1 mM spermine, 0.15% mercaptoethanol, 0.5 M sucrose, pH 9.5, 0.5% Triton X-100). The purified nuclei were suspended in 500 µl of lysis buffer (50 mM Tris-HCl (pH 8.0), 10 mM EDTA, 0.4% SDS, 1 mM PMSF), and the chromatin was sheared into fragments ranging from 100-500 bp using the water-based Bioruptor (Diagenode) at the high power setting. After sonication, fragmented chromatin was cleared by centrifugation at 13,200 rpm at 4 ℃ for 12 min. The supernatant was diluted 1:10 with IP buffer (25 mM HEPES pH 7.5, 10.5 mM NaCl, 110 mM KCl and 1 mM MgCl2). 10 µg of BG4-FLAG recombinant protein, which has been well characterized in humans ([Biffi et al. 2013](#_ENREF_4); [Hänsel-Hertsch et al. 2018](#_ENREF_17)), was added to the chromatin and incubated with rotation overnight at 4℃. BG4-chromatin complexes were captured using 50 µl of anti-FLAG M2 magnetic beads (Sigma, M8823), and eluted from the magnetic beads by adding 250 μl of freshly prepared elution buffer (100 mM NaHCO3, 1% SDS). Eluted chromatin was digested with RNase A at 37℃ for 30 min and reverse cross-linked at 65℃ overnight. DNA was then purified using phenol:chloroform extraction and ethanol precipitation. Finally, the DNA pellet was dissolved in 20 µl of EB buffer (10 mM Tris-HCl, pH 8.0).

For the G4-ChIP-PCR assays, 1 µl of purified DNA from G4-DNA ChIP was used as the template in all reactions. Four pairs of positive control primers (P1-P4) from the quadruplex forming regions co-localized with R-loops, and one pair of negative control primers (N) from a R-loop without G4 were used for PCR. PCR was conducted as follows: 95 °C x 1 min followed by 28 cycles of 95 °C x 30 sec, 63 °C x 40 sec, and 72 °C for 1 min. PCR products were separated using a 1.5% agarose gel in 1xTAE buffer and then visualized and recorded using a nucleic acid staining dye with UV exposure. Similarly, five positive primer sets (G4s-P1-P5) and one negative primer set (G4-N) were used for the G4-ChIP-qPCR assays. Two biological replicates of genomic DNA-based G4-ChIPed DNA were used for qPCR assays, and each qPCR (with the same primer set) was repeated three times per assay. All primer information is listed in **Supplemental Table S10**.

**Dot blotting assay with S9.6 antibody, anti-5mC, anti-6mA and the recombinant BG4 protein**

Purified, sonicated genomic DNA used for the DRIP-seq experiment was treated with or without RNase H followed by phenol:chloroform purification and ethanol precipitation. RNase H-treated or untreated DNA was loaded onto an Amersham Hybond-N+-nylon membrane. After air-drying, the membrane was pre-blocked in 5% milk overnight at 4℃, and then incubated with anti-S9.6 antibody (1:2,500 dilution) overnight at 4 ℃. After washing three times, membranes were stained with horseradish peroxidase (HRP)- conjugated anti-mouse secondary antibody (1:10,000) followed by immuno-signal development and recording. Similar procedures were used for the anti-5mC (Aviva Systems Biology, AMM99021), anti-m6A (abcam, ab151230) and anti-FLAG antibodies, which were used for detecting 5mC (5-methylcytosines), 6mA (N6-methyladenosine) and G4 in rice, respectively. The anti-FLAG antibody specifically targets the recombinant BG4 protein fused with a FLAG tag. Each blot was repeated at least two times.

**Western blotting assay**

Western blotting was done following published procedures ([Pan et al. 2017](#_ENREF_34)). Total proteins were extracted from leaf tissue of wildtype (WT) and transgenic lines. The proteins were separated using a SDS-PAGE gel before they were transferred to a PVDF membrane followed by pre-blocking, and incubation with primary antibodies (H3K9me2, ab1220 abcam; H3K4me3, ab8580 abcam; H3K9me3, 07-442 Merck Millipore; H3ac, 06-599 Merck Millipore and anti-GFP, ab290 abcam), and detection with goat anti-mouse or anti-rabbit secondary antibodies conjugated with HRP. Each blot was repeated at least two times. Immunosignals were digitally recorded and analyzed using Clinx Chem Analysis software.

**Strand specific RT-PCR (ssRT-PCR) assay**

Total RNA was extracted from two-week old seedlings using the RNeasy Plant Mini kit (Qiagen, 74904). Total RNA was treated with DNase I at 37 ℃ for 30 min to remove contamination of genomic DNA. Next, the total RNA was reverse transcribed using a strand-specific primer to produce the first-strand specific cDNA; this was done using the SuperScript III Reverse Transcriptase kit (Thermo Fisher Scientific, 18080-044) according to the manual. PCR was performed using the primer pairs listed in **Supplemental Table S7**. PCR products were separated by running agarose gels containing ethidium bromide, and the images were recorded using a gel documentation system.

**DRIP-qPCR assay**

DRIPed DNA, the same as that used for r DRIP-seq library preparation, was used as a template for the qPCR assay. Four positive genomic loci with R-loops and three negative genomic loci without R-loops were randomly selected for qPCR assays. The primers used in qPCR assays are described in **Supplemental Table S8**. All qPCR assays were run in triplicate with two independent biological replicates using a LightCycler 480 instrument (Roche); the percentage of immunoprecipitated DNA between non-RNase H and RNase H treatment was calculated by ΔΔCt method and expressed as fold change over the input. Means and error bars (standard deviations) were calculated and displayed.

**Normalization of read counts**

Uniquely mappable reads from DNase-seq, MNase-seq, ChIP-seq, and DNA 6mA-IP-seq data sets were integrated with DRIP-seq data sets for comprehensive analyses of R-loops in relation to chromatin signatures. The regions ± 1 kb upstream and downstream of TSSs from all genes with R-loops were divided into 50 bp windows for normalization. The number of reads per sliding window was first divided by the window length (50 bp) and then by the number of all uniquely mappable reads within the genome (Mb). For all mapped reads, their positions in the rice genome were used to determine the midpoint of the read.

**Gene ontology (GO) and KEGG enrichment analysis**

GO and KEGG enrichment analyses were performed for genes from *k*-means clustering as shown in Fig. 5A. The enriched GO terms were identified with an online tool called agriGO (<http://bioinfo.cau.edu.cn/agriGO>) ([Du et al. 2010](#_ENREF_3)). The KEGG analysis was performed using ClueGO version 2.5.0 ([Bindea et al. 2009](#_ENREF_2)).

**Motif prediction**

Comprehensive motif analyses were performed on the displaced DNA strands corresponding to ± 250 bp at the peak summit of R-loops using MEME-ChIP (http://meme-suite.org/tools/meme-chip) ([Machanick and Bailey 2011](#_ENREF_11)). The analyses included de novo motif discovery using MEME and DREME and identification of known motifs using CentriMo ([Bailey and Machanick 2012](#_ENREF_1)). We only analyzed the top five significantly enriched motifs with the highest e-values from seedlings and calli.

**References**

Bayona-Feliu A, Casas-Lamesa A, Reina O, Bernués J, Azorín F. 2017. Linker histone H1 prevents R-loop accumulation and genome instability in heterochromatin. *Nat Commun* **8:** 283. doi:[10.1038/s41467-017-00338-5](http://dx.doi.org/10.1038/s41467-017-00338-5)

Belotserkovskii BP, Liu R, Tornaletti S, Krasilnikova MM, Mirkin SM, Hanawalt PC. 2010. Mechanisms and implications of transcription blockage by guanine-rich DNA sequences. *Proc Natl Acad Sci* **107:** 12816-21. doi:[10.1073/pnas.1007580107](http://dx.doi.org/10.1073/pnas.1007580107)

Belotserkovskii BP, Mirkin SM, Hanawalt PC. 2013. DNA sequences that interfere with transcription: implications for genome function and stability. *Chem Rev* **113:** 8620-8637. doi:[10.1021/cr400078y](http://dx.doi.org/10.1021/cr400078y)

Biffi G, Tannahill D, McCafferty J, Balasubramanian S. 2013. Quantitative visualization of DNA G-quadruplex structures in human cells. *Nat Chem* **5:** 182-186. doi:[10.1038/nchem.1548](http://dx.doi.org/10.1038/nchem.1548)

Boguslawski SJ, Smith DE, Michalak MA, Mickelson KE, Yehle CO, Patterson WL, Carrico RJ. 1986. Characterization of monoclonal antibody to DNA.RNA and its application to immunodetection of hybrids. *J Immunol Methods* **89:** 123-30. doi:[10.1016/0022-1759(86)90040-2](https://doi.org/10.1016/0022-1759(86)90040-2" \o "Persistent link using digital object identifier" \t "_blank)

Chan YA, Aristizabal MJ, Lu PY, Luo Z, Hamza A, Kobor MS, Stirling PC, Hieter P. 2014. Genome-wide profiling of yeast DNA:RNA hybrid prone sites with DRIP-chip. *PLoS Genet* **10:** e1004288. doi:[10.1371/journal.pgen.1004288](http://dx.doi.org/10.1371/journal.pgen.1004288)

Chen PB, Chen HV, Acharya D, Rando OJ, Fazzio TG. 2015. R loops regulate promoter-proximal chromatin architecture and cellular differentiation. *Nat Struct Mol Biol* **22:** 999-1007. doi:[10.1038/nsmb.3122](http://dx.doi.org/10.1038/nsmb.3122)

Crouch RJ, Dirksen ML. 1982. Ribonucleases H. In *Nucleases (*eds. SM Linn, RJ Roberts*)*, pp. 211-241. Cold Spring Harbor Laboratory, Cold Spring Harbor, New York.

Duquette ML, Handa P, Vincent JA, Taylor AF, Maizels N. 2004. Intracellular transcription of G-rich DNAs induces formation of G-loops, novel structures containing G4 DNA. *Genes Dev* **18:** 1618-29. doi:[10.1101/gad.1200804](http://dx.doi.org/10.1101/gad.1200804)

Fazzio TG. 2016. Regulation of chromatin structure and cell fate by R-loops. *Transcription* **7:** 121-126. doi:[10.1080/21541264.2016.1198298](http://dx.doi.org/10.1080/21541264.2016.1198298)

Frank-Kamenetskii MD, Mirkin SM. 1995. Triplex DNA structures. *Annu Rev Biochem* **64:** 65-95. doi:[10.1146/annurev.bi.64.070195.000433](http://dx.doi.org/10.1146/annurev.bi.64.070195.000433)

Freeling M, Subramaniam S. 2009. Conserved noncoding sequences (CNSs) in higher plants. *Curr Opin Plant Biol* **12:** 126-32. doi:[10.1016/j.pbi.2009.01.005](http://dx.doi.org/10.1016/j.pbi.2009.01.005)

García-Rubio ML, Pérez-Calero C, Barroso SI, Tumini E, Herrera-Moyano E, Rosado IV, Aguilera A. 2015. The fanconi anemia pathway protects genome integrity from R-loops. *PLoS Genet* **11:** e1005674. doi:[10.1371/journal.pgen.1005674](http://dx.doi.org/10.1371/journal.pgen.1005674)

Ginno PA, Lim YW, Lott PL, Korf I, Chedin F. 2013. GC skew at the 5' and 3' ends of human genes links R-loop formation to epigenetic regulation and transcription termination. *Genome Res* **23:** 1590-600. doi:[10.1101/gr.158436.113](http://dx.doi.org/10.1101/gr.158436.113)

Hänsel-Hertsch R, Beraldi D, Lensing SV, Marsico G, Zyner K, Parry A, Di Antonio M, Pike J, Kimura H, Narita M, et al. 2016. G-quadruplex structures mark human regulatory chromatin. *Nat Genet* **48:** 1267-72. doi:[10.1038/ng.3662](http://dx.doi.org/10.1038/ng.3662)

Hänsel-Hertsch R, Di Antonio M, Balasubramanian S. 2017. DNA G-quadruplexes in the human genome: detection, functions and therapeutic potential. *Nat Rev Mol Cell Biol* **18:** 279-284. doi:[10.1038/nrm.2017.3](http://dx.doi.org/10.1038/nrm.2017.3)

Hänsel-Hertsch R, Spiegel J, Marsico G, Tannahill D, Balasubramanian S. 2018. Genome-wide mapping of endogenous G-quadruplex DNA structures by chromatin immunoprecipitation and high-throughput sequencing. *Nat Protoc* **13:** 551-564. doi:[10.1038/nprot.2017.150](http://dx.doi.org/10.1038/nprot.2017.150)

Haeusler AR, Donnelly CJ, Periz G, Simko EA, Shaw PG, Kim MS, Maragakis NJ, Troncoso JC, Pandey A, Sattler R, et al. 2014. C9orf72 nucleotide repeat structures initiate molecular cascades of disease. *Nature* **507:** 195-200. doi:[10.1038/nature13124](http://dx.doi.org/10.1038/nature13124)

Halasz L, Karanyi Z, Boros-Olah B, Kuik-Rozsa T, Sipos E, Nagy E, Mosolygo LA, Mazlo A, Rajnavolgyi E, Halmos G, et al. 2017. RNA-DNA hybrid (R-loop) immunoprecipitation mapping: an analytical workflow to evaluate inherent biases. *Genome Res* **27:** 1063-1073. doi:[10.1101/gr.246652.118](http://dx.doi.org/10.1101/gr.246652.118)

Huang FT, Yu K, Balter BB, Selsing E, Oruc Z, Khamlichi AA, Hsieh CL, Lieber MR. 2007. Sequence dependence of chromosomal R-loops at the immunoglobulin heavy-chain Smu class switch region. *Mol Cell Biol* **27:** 5921-32. doi:[10.1128/MCB.00702-07](http://dx.doi.org/10.1128/mcb.00702-07)

Huang FT, Yu K, Hsieh CL, Lieber MR. 2006. Downstream boundary of chromosomal R-loops at murine switch regions: implications for the mechanism of class switch recombination. *Proc Natl Acad Sci* **103:** 5030-5. doi:[10.1073/pnas.0506548103](http://dx.doi.org/10.1073/pnas.0506548103)

Huppert JL, Balasubramanian S. 2005. Prevalence of quadruplexes in the human genome. *Nucleic Acids Res* **33:** 2908-16. doi:[10.1093/nar/gki609](http://dx.doi.org/10.1093/nar/gki609)

Isaichev G. 1973. From clinical practice (a review of the articles submitted to the editors). *Veterinariia* **10:** 104-7.

Kooiker M, Airoldi CA, Losa A, Manzotti PS, Finzi L, Kater MM, Colombo L. 2005. BASIC PENTACYSTEINE1, a GA binding protein that induces conformational changes in the regulatory region of the homeotic Arabidopsis gene SEEDSTICK. *Plant Cell* **17:** 722-9. doi:[10.1105/tpc.104.030130](http://dx.doi.org/10.1105/tpc.104.030130)

Kuznetsov VA, Bondarenko V, Wongsurawat T, Yenamandra SP, Jenjaroenpun P. 2018. Toward predictive R-loop computational biology: genome-scale prediction of R-loops reveals their association with complex promoter structures, G-quadruplexes and transcriptionally active enhancers. *Nucleic Acids Res* **46:** 7566-7585. doi:[10.1093/nar/gky554](http://dx.doi.org/10.1093/nar/gky554)

Loomis EW, Sanz LA, Chédin F, Hagerman PJ. 2014. Transcription-associated R-loop formation across the human FMR1 CGG-repeat region. *PLoS Genet* **10:** e1004294. doi:[10.1371/journal.pgen.1004294](http://dx.doi.org/10.1371/journal.pgen.1004294)

Luo GZ, MacQueen A, Zheng G, Duan H, Dore LC, Lu Z, Liu J, Chen K, Jia G, Bergelson J, et al. 2014. Unique features of the m6A methylome in Arabidopsis thaliana. *Nat Commun* **5:** 5630. doi:[10.1038/ncomms6630](http://dx.doi.org/10.1038/ncomms6630)

Nadel J, Athanasiadou R, Lemetre C, Wijetunga NA, OBroin P, Sato H, Zhang Z, Jeddeloh J, Montagna C, Golden A, et al. 2015. RNA:DNA hybrids in the human genome have distinctive nucleotide characteristics, chromatin composition, and transcriptional relationships. *Epigenetics Chromatin* **8**: 46. doi:[10.1186/s13072-015-0040-6](http://dx.doi.org/10.1186/s13072-015-0040-6)

Reddy K, Tam M, Bowater RP, Barber M, Tomlinson M, Edamura KN, Wang YH, Pearson CE. 2011. Determinants of R-loop formation at convergent bidirectionally transcribed trinucleotide repeats. *Nucleic Acids Res* **39:** 1749-1762. doi:[10.1093/nar/gkq935](http://dx.doi.org/10.1093/nar/gkq935)

Sanz LA, Hartono SR, Lim YW, Steyaert S, Rajpurkar A, Ginno PA, Xu X, Chedin F. 2016. Prevalent, dynamic, and conserved R-Loop structures associate with specific epigenomic signatures in mammals. *Mol Cell* **63:** 167-78. doi:[10.1016/j.molcel.2016.05.032](http://dx.doi.org/10.1016/j.molcel.2016.05.032)

Shafiq S, Chen C, Yang J, Cheng L, Ma F, Widemann E, Sun Q. 2017. DNA topoisomerase 1 prevents R-loop accumulation to modulate auxin-regulated root development in rice. *Mol Plant* **10:** 821-833. doi:[10.1016/j.molp.2017.04.001](http://dx.doi.org/10.1016/j.molp.2017.04.001)

Shivji MKK, Renaudin X, Williams CH, Venkitaraman AR. 2018. BRCA2 regulates transcription elongation by RNA polymerase II to prevent R-Loop accumulation. *Cell Rep* **22:** 1031-1039. doi:[10.1016/j.celrep.2017.12.086](http://dx.doi.org/10.1016/j.celrep.2017.12.086)

Skourti-Stathaki K, Proudfoot NJ, Gromak N. 2011. Human senataxin resolves RNA/DNA hybrids formed at transcriptional pause sites to promote Xrn2-dependent termination. *Mol Cell* **42:** 794-805. doi:[10.1016/j.molcel.2011.04.026](http://dx.doi.org/10.1016/j.molcel.2011.04.026)

Sun Q, Csorba T, Skourti-Stathaki K, Proudfoot NJ, Dean C. 2013. R-loop stabilization represses antisense transcription at the Arabidopsis FLC locus. *Science* **340:** 619-21. doi:[10.1126/science.1234848](http://dx.doi.org/10.1126/science.1234848)

Todd AK, Johnston M, Neidle S. 2005. Highly prevalent putative quadruplex sequence motifs in human DNA. *Nucleic Acids Res* **33:** 2901-7. doi:[10.1093/nar/gki553](http://dx.doi.org/10.1093/nar/gki553)

Tous C, Aguilera A. 2007. Impairment of transcription elongation by R-loops in vitro. *Biochem Biophys Res Commun* **360:** 428-32. doi:[10.1016/j.bbrc.2007.06.098](http://dx.doi.org/10.1016/j.bbrc.2007.06.098)

Vollbrecht E, Springer PS, Goh L, Buckler ES 4th, Martienssen R. 2005. Architecture of floral branch systems in maize and related grasses. *Nature* **436:** 1119-26. doi:[10.1038/nature03892](http://dx.doi.org/10.1038/nature03892)

Wang L, Si Y, Dedow LK, Shao Y, Liu P, Brutnell TP. 2011. A low-cost library construction protocol and data analysis pipeline for illumina-based strand-specific multiplex RNA-Seq. *Plos One* **6:** e26426. doi:[10.1371/journal.pone.0026426](http://dx.doi.org/10.1371/journal.pone.0026426)

Wanrooij PH, Uhler JP, Shi Y, Westerlund F, Falkenberg M, Gustafsson CM. 2012. A hybrid G-quadruplex structure formed between RNA and DNA explains the extraordinary stability of the mitochondrial R-loop. *Nucleic Acids Res* **40:** 10334-44. doi:[10.1093/nar/gks802](http://dx.doi.org/10.1093/nar/gks802)

Xu W, Xu H, Li K, Fan Y, Liu Y, Yang X, Sun Q. 2017. The R-loop is a common chromatin feature of the Arabidopsis genome. *Nat Plants* **3:** 704-714. doi:[10.1038/s41477-017-0004-x](http://dx.doi.org/10.1038/s41477-017-0004-x)

Yanagisawa S. 2000. Dof1 and Dof2 transcription factors are associated with expression of multiple genes involved in carbon metabolism in maize. Plant J 21: 281-8. doi:[10.1046/j.1365-313x.2000.00685.x](https://doi.org/10.1046/j.1365-313x.2000.00685.x)

Yu K, Roy D, Huang FT, Lieber MR. 2006. Detection and structural analysis of R-loops. *Methods Enzymol* **409:** 316-29. doi:[10.1016/S0076-6879(05)09018-X](http://dx.doi.org/10.1016/s0076-6879(05)09018-x)

Yun J, Kim YS, Jung JH, Seo PJ, Park CM. 2012. The AT-hook motif-containing protein AHL22 regulates flowering initiation by modifying FLOWERING LOCUS T chromatin in Arabidopsis. *J Biol Chem* **287:** 15307-16. doi:[10.1074/jbc.M111.318477](http://dx.doi.org/10.1074/jbc.m111.318477)

Zhang W, Wu Y, Schnable JC, Zeng Z, Freeling M, Crawford GE, Jiang J. 2012. High-resolution mapping of open chromatin in the rice genome. *Genome Res* **22:** 151-62. doi:[10.1101/gr.131342.111](http://dx.doi.org/10.1101/gr.131342.111)

Zhang YC, Liao JY, Li ZY, Yu Y, Zhang JP, Li QF, Qu LH, Shu WS, Chen YQ. 2014. Genome-wide screening and functional analysis identify a large number of long noncoding RNAs involved in the sexual reproduction of rice. *Genome Biol* **15:** 512. doi:[10.1186/s13059-014-0512-1](http://dx.doi.org/10.1186/s13059-014-0512-1)

Zheng KW, Xiao S, Liu JQ, Zhang JY, Hao YH, Tan Z. 2013. Co-transcriptional formation of DNA:RNA hybrid G-quadruplex and potential function as constitutional cis element for transcription control. *Nucleic Acids Res* **41:** 5533-41. doi:[10.1093/nar/gkt264](http://dx.doi.org/10.1093/nar/gkt264)
