# Supplementary material for: Characterization of functional relationships of R-loops with gene transcription and epigenetic modifications in rice
Source: HighWire-hosted journal article supplement (doi:10.1101/gr.246009.118), 2019-07-01
Supplement: Supplemental_Table_S3_.xlsx [file Supplemental_Table_S3_.xlsx]

## Sheet: Legend
Table S3. Summary of the KEGG enrichment analysis for genes associated with each cluster within each R-loop type. All genes associated with each cluster within each R-loop type were used for KEGG enrichment analysis, and only a subset of genes with significant GOterm enrichment were listed in the table.

## Sheet: S3
R-loops type	Cluster	GOID	GOTerm	Ontology Source	Term PValue	Term PValue Corrected with Bonferroni step down	% Associated Genes	Nr. Genes	Associated Genes Found
SO-RLs	SC3	KEGG:00904	Diterpenoid biosynthesis	KEGG_01.03.2018	0.000786634	0.000786634	9.375	3	LOC4334841, LOC4336962, LOC4341340
SO-RLs	SC4	KEGG:02010	ABC transporters	KEGG_01.03.2018	0.00010525	0.000841996	20	5	LOC4323895, LOC4330390, LOC4336042, LOC4336189, LOC4339511
SO-RLs	SC5	KEGG:04141	Protein processing in endoplasmic reticulum	KEGG_01.03.2018	0.000466479	0.0191257	11.9403	24	LOC4324566, LOC4324808, LOC4325695, LOC4327812, LOC4328075, LOC4330496, LOC4330933, LOC4331645, LOC4332391, LOC4332413, LOC4332538, LOC4334673, LOC4336584, LOC4338551, LOC4339262, LOC4341597, LOC4342826, LOC4346639, LOC4347402, LOC4347551, LOC4348731, LOC4350002, LOC4350905, LOC9267167
type	Cluster	GOID	GOTerm	Ontology Source	Term PValue	Term PValue Corrected with Bonferroni step down	% Associated Genes	Nr. Genes	Associated Genes Found
ASO-RLs	ASC1	KEGG:00500	Starch and sucrose metabolism	KEGG_01.03.2018	1.4744e-05	0.000545526	13.8889	20	LOC4330221, LOC4330753, LOC4330912, LOC4332097, LOC4332112, LOC4333062, LOC4336146, LOC4336515, LOC4337312, LOC4339718, LOC4340018, LOC4341833, LOC4342819, LOC4343706, LOC4343959, LOC4345573, LOC4347265, LOC4348315, LOC4349141, LOC9267759
ASO-RLs	ASC1	KEGG:00940	Phenylpropanoid biosynthesis	KEGG_01.03.2018	1.96161e-07	7.45413e-06	15.6863	24	LOC4325129, LOC4326874, LOC4328552, LOC4330037, LOC4330040, LOC4330684, LOC4331271, LOC4331437, LOC4331649, LOC4336146, LOC4336415, LOC4337259, LOC4341248, LOC4342251, LOC4344045, LOC4345689, LOC4346141, LOC4346438, LOC4347520, LOC4348315, LOC4349241, LOC4349427, LOC9267003, LOC9267759
ASO-RLs	ASC1	KEGG:04075	Plant hormone signal transduction	KEGG_01.03.2018	0.000260175	0.00936629	10.6481	23	LOC4326893, LOC4327919, LOC4329252, LOC4332229, LOC4333512, LOC4338948, LOC4340320, LOC4340708, LOC4341530, LOC4342865, LOC4343704, LOC4343785, LOC4346394, LOC4348107, LOC4348237, LOC4349742, LOC4349800, LOC4349885, LOC4350099, LOC4350100, LOC4351457, LOC4351527, LOC9266123
ASO-RLs	ASC2	KEGG:04626	Plant-pathogen interaction	KEGG_01.03.2018	0.000241022	0.0127742	15.6028	22	LOC4324100, LOC4325760, LOC4325762, LOC4325862, LOC4326638, LOC4327438, LOC4327560, LOC4330041, LOC4330957, LOC4332325, LOC4336258, LOC4336783, LOC4338474, LOC4339397, LOC4339751, LOC4340367, LOC4344525, LOC4346173, LOC4349714, LOC4351450, LOC4352234, LOC9266580
ASO-RLs	ASC3	KEGG:03010	Ribosome	KEGG_01.03.2018	6.84288e-11	5.06373e-09	23.5465	81	LOC4323904, LOC4324441, LOC4325100, LOC4325282, LOC4325555, LOC4325892, LOC4326383, LOC4326457, LOC4326865, LOC4327004, LOC4327087, LOC4327104, LOC4327414, LOC4327541, LOC4328016, LOC4328392, LOC4328472, LOC4328932, LOC4329034, LOC4329362, LOC4329423, LOC4330425, LOC4331459, LOC4331942, LOC4332089, LOC4332773, LOC4332793, LOC4333016, LOC4333083, LOC4333308, LOC4333387, LOC4333848, LOC4334131, LOC…
ASO-RLs	ASC4	KEGG:04130	SNARE interactions in vesicular transport	KEGG_01.03.2018	0.000291818	0.00904637	23.6842	9	LOC4328159, LOC4331172, LOC4334384, LOC4339929, LOC4343711, LOC4345157, LOC4346340, LOC4347065, LOC4348130
ASO-RLs	ASC5	KEGG:04120	Ubiquitin mediated proteolysis	KEGG_01.03.2018	0.00038391	0.0226507	17.3913	20	LOC4325905, LOC4326008, LOC4327162, LOC4327386, LOC4330476, LOC4332583, LOC4333165, LOC4333728, LOC4333737, LOC4337553, LOC4337820, LOC4339013, LOC4339794, LOC4340379, LOC4342488, LOC4344771, LOC4349557, LOC4352424, LOC4352894, LOC9266295
ASO-RLs	ASC5	KEGG:04144	Endocytosis	KEGG_01.03.2018	0.000786954	0.0456433	15.7143	22	LOC4324542, LOC4325480, LOC4325946, LOC4327163, LOC4327840, LOC4329228, LOC4329866, LOC4330565, LOC4334459, LOC4334545, LOC4335713, LOC4336871, LOC4342644, LOC4342802, LOC4343227, LOC4344016, LOC4344788, LOC4346566, LOC4348493, LOC4348891, LOC4349482, LOC4351755
type	Cluster	GOID	GOTerm	Ontology Source	Term PValue	Term PValue Corrected with Bonferroni step down	% Associated Genes	Nr. Genes	Associated Genes Found
S/AS-RLs	S/ASC1	KEGG:03008	Ribosome biogenesis in eukaryotes	KEGG_01.03.2018	0.000346352	0.000346352	4.30108	4	LOC4325442, LOC4335406, LOC4349717, LOC4351433
S/AS-RLs	S/ASC2	KEGG:00073	Cutin, suberine and wax biosynthesis	KEGG_01.03.2018	0.000238806	0.000716417	21.0526	4	LOC4330012, LOC4346864, LOC4347887, LOC4348947
S/AS-RLs	S/ASC2	KEGG:04075	Plant hormone signal transduction	KEGG_01.03.2018	0.00978164	0.0195633	4.16667	9	LOC4325063, LOC4329459, LOC4337309, LOC4338933, LOC4344247, LOC4344471, LOC4346610, LOC4347436, LOC9272441
S/AS-RLs	S/ASC3	KEGG:04075	Plant hormone signal transduction	KEGG_01.03.2018	0.00039755	0.0007951	4.62963	10	LOC4325078, LOC4328516, LOC4334069, LOC4335937, LOC4338764, LOC4339756, LOC4347277, LOC4348447, LOC4352721, LOC9266109
S/AS-RLs	S/ASC3	KEGG:04712	Circadian rhythm	KEGG_01.03.2018	0.00547313	0.00547313	10.7143	3	LOC4325329, LOC4327931, LOC4341923
S/AS-RLs	S/ASC4	KEGG:00196	Photosynthesis	KEGG_01.03.2018	0.000486954	0.0136347	33.3333	5	LOC4324599, LOC4343583, LOC4343604, LOC4345663, LOC4346803
S/AS-RLs	S/ASC4	KEGG:04016	MAPK signaling pathway	KEGG_01.03.2018	3.25691e-05	0.000977073	14.5299	17	LOC4328073, LOC4328647, LOC4332548, LOC4333435, LOC4335877, LOC4337502, LOC4338104, LOC4340000, LOC4340170, LOC4341476, LOC4342431, LOC4345742, LOC4347158, LOC4347439, LOC4349472, LOC4351576, LOC4352660
S/AS-RLs	S/ASC4	KEGG:04075	Plant hormone signal transduction	KEGG_01.03.2018	2.89751e-06	9.27203e-05	12.5	27	LOC4325758, LOC4325890, LOC4328647, LOC4331008, LOC4331834, LOC4332548, LOC4333435, LOC4333860, LOC4335877, LOC4337502, LOC4337780, LOC4338104, LOC4338907, LOC4338955, LOC4339158, LOC4340170, LOC4340462, LOC4341111, LOC4341476, LOC4342431, LOC4344334, LOC4347439, LOC4347886, LOC4349472, LOC4350632, LOC4352660, LOC9271913
S/AS-RLs	S/ASC4	KEGG:00562	Inositol phosphate metabolism	KEGG_01.03.2018	6.16809e-06	0.000191211	22.2222	12	LOC4331188, LOC4332146, LOC4333853, LOC4333967, LOC4342610, LOC4344391, LOC4344440, LOC4345232, LOC4345725, LOC4347947, LOC4349492, LOC9267129
S/AS-RLs	S/ASC4	KEGG:04070	Phosphatidylinositol signaling system	KEGG_01.03.2018	4.3674e-05	0.00126655	20	11	LOC4331188, LOC4332146, LOC4333853, LOC4333967, LOC4344391, LOC4344440, LOC4345232, LOC4345725, LOC4347947, LOC4349492, LOC9267129
S/AS-RLs	S/ASC5	KEGG:03013	RNA transport	KEGG_01.03.2018	2.96183e-05	0.00118473	16.0494	26	LOC4324336, LOC4325820, LOC4328251, LOC4328994, LOC4331780, LOC4332327, LOC4332822, LOC4332834, LOC4333834, LOC4337552, LOC4338260, LOC4338508, LOC4339079, LOC4339487, LOC4340958, LOC4342306, LOC4342827, LOC4342961, LOC4343565, LOC4344300, LOC4345234, LOC4345242, LOC4345621, LOC4348536, LOC4351236, LOC9269193
S/AS-RLs	S/ASC5	KEGG:03040	Spliceosome	KEGG_01.03.2018	0.000156641	0.00610901	14.0625	27	LOC4324336, LOC4326227, LOC4327388, LOC4328133, LOC4328484, LOC4328504, LOC4328758, LOC4332206, LOC4332209, LOC4332806, LOC4332822, LOC4332999, LOC4333731, LOC4334598, LOC4334703, LOC4334964, LOC4335542, LOC4339012, LOC4339621, LOC4341330, LOC4343955, LOC4345254, LOC4345621, LOC4348309, LOC4351208, LOC4351236, LOC4352279
