# Supplementary material for: Characterization of functional relationships of R-loops with gene transcription and epigenetic modifications in rice
Source: HighWire-hosted journal article supplement (doi:10.1101/gr.246009.118), 2019-07-01
Supplement: Supplemental_Table_S7_.xlsx [file Supplemental_Table_S7_.xlsx]

## Sheet: Legend
Tabls S7. Summary of PCR primer sequence information used for ssRT-PCR assay. Genomic loci associated with R-loops were randomly chose for designing PCR primers for ssRT-PCR assay. "+" represent the sense R-loop; "-" represent the antisense R-loop; "Null" represent the R-loop was not detected

## Sheet: S7
ID	Primer (Forward)	Primer (Reverse)	Transcript direction of DR
1	CCTTTGGAGGGGTAGAACA	CTAATCAACGCCAGCCAC	+
2	CTGCATTGCGGTTTCTTG	TCCTCCCTGCGATTTCTTT	+;-
3	GCGGCGTCTAGGGTTTCG	CAACCACGGGCTTAGGGA	+;-
4	TTTGGACGAGGGGAGGAGA	TAACCCAAAGCCCTTACGC	+
5	TTGGGCGGGTAGGATTGG	TTGGCGATTGGCGGGAAG	+
6	ATAGCGAAGAAAACAGAGGC	TGAGGTGGCGACGACGAG	+;-
7	TAATAAGGCCGGAGGAAG	TGGACTATACAACTGGACGAA	-
8	GCCCTCATCACTGTTTCGC	GGATCAGCTTGGCCTCCCT	Null
9	AGTAGGAATTGAAATTGGGTAC	CTCGCCATCTTATGCTTG	+;-
10	GTGCTCCACCCGCTGCTCTT	GCGAAGGCGTAAACCTGTGAG	+;-
11	TAAACGTGGGAGTACAGTCAGC	CTCCTCCGTCGCCATTCT	+;-
12	TAGCCCATGACAGACAGATTG	GTGGAACGGAACGGAGGA	+;-
13	AGGAGACGGGAAGGAGGA	GGCCCAACCAGTACAAGG	+;-
14	CAGTAGTACATGAGGAGGAAG	ATTTGGGAAACCCTGTCT	+;-
15	TCCCTCAACTTAACAGCTA	AAAAGATGTGCAACTGACA	+;-
16	CCTTGCCTCTAGTAAGGTC	GTGAATGGGAGATGGTTGT	Null
17	AGAGCTCGGTCGATGTGG	TCGTCGCCTTCCCTTCCT	Null
18	GGGAGAAGATGCGGGGAGG	GGGAGAAGATGCGGGGAGG	-
19	GCCGCCGAGGAAATCT	CCCCTTCGCTGTCTGTT	-
20	TGTTTGGGCGGGAGAATT	TACGGGCCTCGTGACTGA	+
21	CTCCTCCGCCGCACTCAT	ATACTGGCACAACAGAAAGAA	+;-
22	AGTTTTGTTGGAGCCTTGG	GTAGAGCACTCGCCGATG	Null
23	ACCGAAGGACCTAAAGTGAA	ATGGGAAGTGATGGACGA	-
24	AATTCTCCGTCTTCTTCTG	AATACCATTTGGGTTTCC	+
25	GAGGAGGGCTAGGGTTTGG	CACCCACCCCACTACAAATA	Null
26	AGAGGCGGGTGGGAGAAT	CGTAGTGAAGCCCAGAAGC	+
27	CGACCGTAGGATGAGGGA	AGCACGAGGAGGAGCAGA	+;-
28	CGCACGACTTACCCATTCC	ATTTGAGGGCAGCGGGAGC	+;-
29	GCAAGGCAAGGTGGTGAG	CCAGTCAAGTCGAGCGGTAT	+
30	AGTAGAGGTGGGAGGAAGC	ACTACAACGAAGACGGGAG	+;-
31	AAGAGGAAGAGGAGACGACGCT	GTGGAACGCATTGGTGGG	Null
32	CGGCACGCAGTAGAAGGAGG	TCGGAGTCGGAGGGAGAAGC	-
33	GACTTGATGGGCTTTCGTGG	GGCGTGGAGAAGACTTAGATGA	+;-
34	GGCAAGAACCGAACGAGAA	TCCACCATCGCCTCCTCT	+
35	GACATTGTGCCATTCTCA	AGGTAGTAACAGGGGTATTT	Null
36	ACGGCGTTGAGGGTCTTG	TTCCGCTCGGGGCCATCC	-
37	GAGGGTGCAAATTAAAGG	ACTAGGCCAAAGCCAAAC	+;-
38	CGCAGTCGCTGTCAGTCT	AAGCAACGCAACGCAATC	+;-
39	GGCGATGCGGTTGAGTTG	CTGCCGTTTCTTTCCTTCT	+
40	GAGGGGAAAGTGAAAGAG	CCGTGTAATGGAATGAAG	Null
41	ACAAATCGGTGGATGGGG	GCCGCTGGTGTCCGTGAT	+;-
42	AGGAGGAGCGGATGGAGG	GAGAAGCGCAGCAACGGA	+;-
43	CCCCAAAACCACGCCACC	CGGAATCCCAGCCCACGT	-
44	ACTGAAGTGGAGCAGAGCAAA	GATCTAGGCCCATCTAAACGAG	+;-
45	CCACCCGAGTCCCTGACA	GCGGGGACAAAGAAACCA	+
46	GGAGGCCGTGAGGGGACA	CGAGGAAGGCGGTGGGAC	+
47	CGTAAGCCCGTGCGATGC	GGTTGGGTGGGTTGGTGAA	Null
48	AGAGGGAGGAAGAAGGAAGA	GTGGCGGTATTGACTAGGTC	+
49	ATGTTTCCCTCCTCGCTGTC	TGTCTGTTATAGTTTGGTGGTTGT	+;-
50	TGACGGTTGGACTTGCTTTG	CCTGCTGCCATCTGCTTTCT	+;-
51	CGGCAAAGCCAAGGTAGG	TCGTCGAGGTCGAAGTCCC	+;-
52	AGGTAGGGTTGGTTGGTTC	CCGCCATGTCTGAGTTTT	-
53	TGTATGTGGCGGAAAGAGG	CGATTCGGAGATGGGGAT	-
54	AAAAGAACGGAAACGAACA	GGCGGAAGCTAGGGTTAG	+;-
55	CGTTTCGTCATATCGTTGG	TGGTGGTGGTGAAATGGA	+;-
56	AAAGTCTCGCGTGGACACCAA	ACTCGGACCCGACCGGATAT	Null
57	CGATTGGGGAAGGAAGCGAG	TCCACCGAGCGCAGATTTCTC	+;-
58	GAGGATAAGCGGAGAACAACT	GCCCAGCCCAATTAACTCT	+;-
59	AGAGGGAGGAGGAAGAAG	TAGCGATATTGACCGAGT	+;-
60	CGAGGAAGGAACCGAAGCG	GAGGGAAGGACTCCACCACC	+;-
61	GAGGAAGAGGAAGGGAGA	AAACCGTTCACTTCAGGTC	+;-
62	AAAATAAACCGTCGATTCCG	AGCCGAGAAAGCAGAGCA	+;-
63	CGAGCAAGCAATGGTGAC	TGATGCCCGTTTCTGATG	+;-
64	AGGGATGATGCGATGGAG	CCTCTTCGCTTTCGCTGT	-
65	TGTCAGCCTCCGTTGGTC	AAATTCAGCGGCATACGAG	-
66	CCTTGGTCCGTAGAGCGAGTT	CGGCGAAGGTGAGGTAGGAG	Null
67	GCTTGGCGAGGAAGTTGTTG	CGTCGATCTCCGGTAGCACA	+;-
68	GCAATGGTTGGGATGTATG	AAGCTCAAGTCCTGCTTCTAG	+;-
69	AGGGTGGTAGGGTTAGGAAGA	TCCCAACCGACTCACGAA	+;-
70	TAATAAGGCCGGAGGAAGC	AAGTTGAAGGACCTGAAATGAA	-
71	GGTTAGGGAAGCAGGACAA	ATCGCATCAGAACAGAAAGC	+;-
72	GTGGCGGATGCCTGTAGT	GTATTTACGTGGCAATTTGATC	+;-
73	CGCAAACCCAGGCAGGAG	TGAGGGGCCGCTTGAGCT	Null
74	AGCGGCGATAGAGGATGT	AGAAGGAAACGGTGAGGC	+;-
75	CCCGTTATTGGGACTGACC	CGAGGGTTTCTGGGTTTG	+
76	CGGCGGGAAATGTGAAGG	TGTTTGGCAAGAAAGGATGG	-
77	CCAAGGAGGGCAGCAACT	GCTTCTTCGCCACCAAATC	+;-
78	ACGGCGAGGACTCGCACG	GAAACGGACGGCTCAAAG	-
79	CTCCTTCAGCTCCACCTCCC	GAGAATCAGAATCCGCTTTGC	Null
80	GCGTTGGATGAAAGGTGA	GAGGAGGAGGTAGGTAGGTGA	+;-
81	TAGCAAAGCAAAGCAGCGAATC	AGGAGCACGAGCTGGAGGAG	+;-
82	ACCGTTTCGCGTGTATCT	CGCTCAGTGCTGCCATCC	-
83	CCTGGTTAGGGTTTCGGTGAG	GCGTTTCTTGGCGTGGAG	+;-
84	CGGATCACCAAATCGTAC	CAATGTGAAGCGGAGAAG	Null
85	GTGGCAGTGTTGACTTGGT	TGGTGATGCGGTCGGTCT	+;-
86	CAGCCTCTTGCCCATCCA	AATCGTCCTCCAACCACA	+
87	GCTGGAGCGGACAAAGGA	CGTGGGTCGTGGCAGTTAT	+
88	CGACGATGCGGTGGAAGA	ACCCATAGGCAGGCGACA	+;-
89	CACCTCCAGCCCAAACAC	AAACGCGGTCGGATCTAG	+;-
90	CATGAAGGTGTCGGGAGTC	GGGCCTGTATTATTTGATTGG	+;-
91	CACATCGCACTGCTCCTCG	TGTCTCCTTCCTTCTTCCTCCT	Null
92	GCAACCGAGGCTAAGAAT	CCATAGAAGGAGGCAACAA	-
93	GATCAACCACAGCGCAGCTT	CGGCGAGTAGCCAAGGTG	Null
94	CGGGACATGGGGAGGA	CGGAAACTGGCGAAGAG	+;-
95	CCTCTGCCGATGCTCAAG	CACCCAAGGTCCCTCAAC	+;-
96	TTTCTCCTCGCCCACCTC	TGCCCTTTCTAGCTTCCAAC	+;-
97	CGGATCGACGGGAAAGAA	GGCGTAGTGGATGGCAGTG	+;-
98	GAGGAGATGAAGCCGTGAA	CTGCTGCTCCCTCAAACA	-
99	AAGGAGCGGAGGAGACGA	GGTGCCCGATTTAGAGGC	+
100	TATGACAGGGCAGCATTA	GTTCTTCCTCCTACCACTA	-
101	AGTGAAAGGTAACCAAAC	GAGAAAGAAAGGGATAAG	-
102	TCGCATCTCGCATCCACA	CCTCGTAAACCTCGTTGTCC	+;-
103	TGAGTGCAACAACGCTAGACGT	CGATGAGGAAAGAGGAGGACA	+;-
104	CCCGATGGACGCTGAACGA	TCCGCCTGCTTGCTTGTG	+;-
